# Supplementary material for: Rain-on-snow responses to warmer Pyrenees: a sensitivity analysis using a physically based snow hydrological model
Source: Copernicus journal article supplement (doi:10.5194/nhess-24-245-2024), 2024-01-30
Supplement: Supplementary file 1 [file nhess-24-245-2024-supplement.pdf]

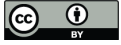

*Supplement of*

## **Rain-on-snow responses to warmer Pyrenees: a sensitivity analysis using a physically based snow hydrological model**

**Josep Bonsoms et al.**

*Correspondence to:* Juan I. López-Moreno (nlopez@ipe.csic.es)

The copyright of individual parts of the supplement might differ from the article licence.

1  
2

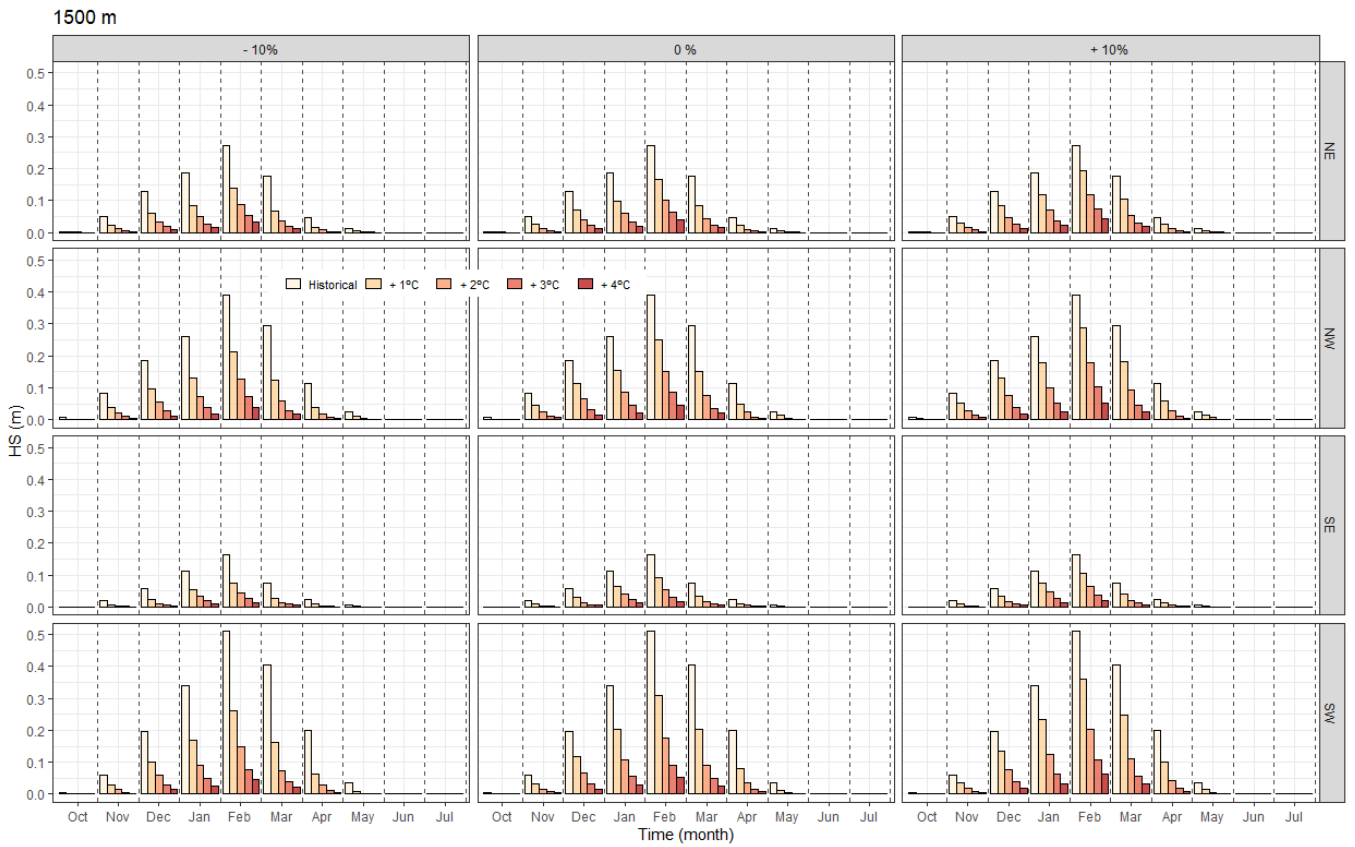

3  
4 **Figure S1.** Height of snow (HS) monthly variation at 1500 m for the historical climate period (1980 – 2019)  
5 and different increments of temperature (colors) grouped by sector and precipitation changes (boxes).  
6  
7

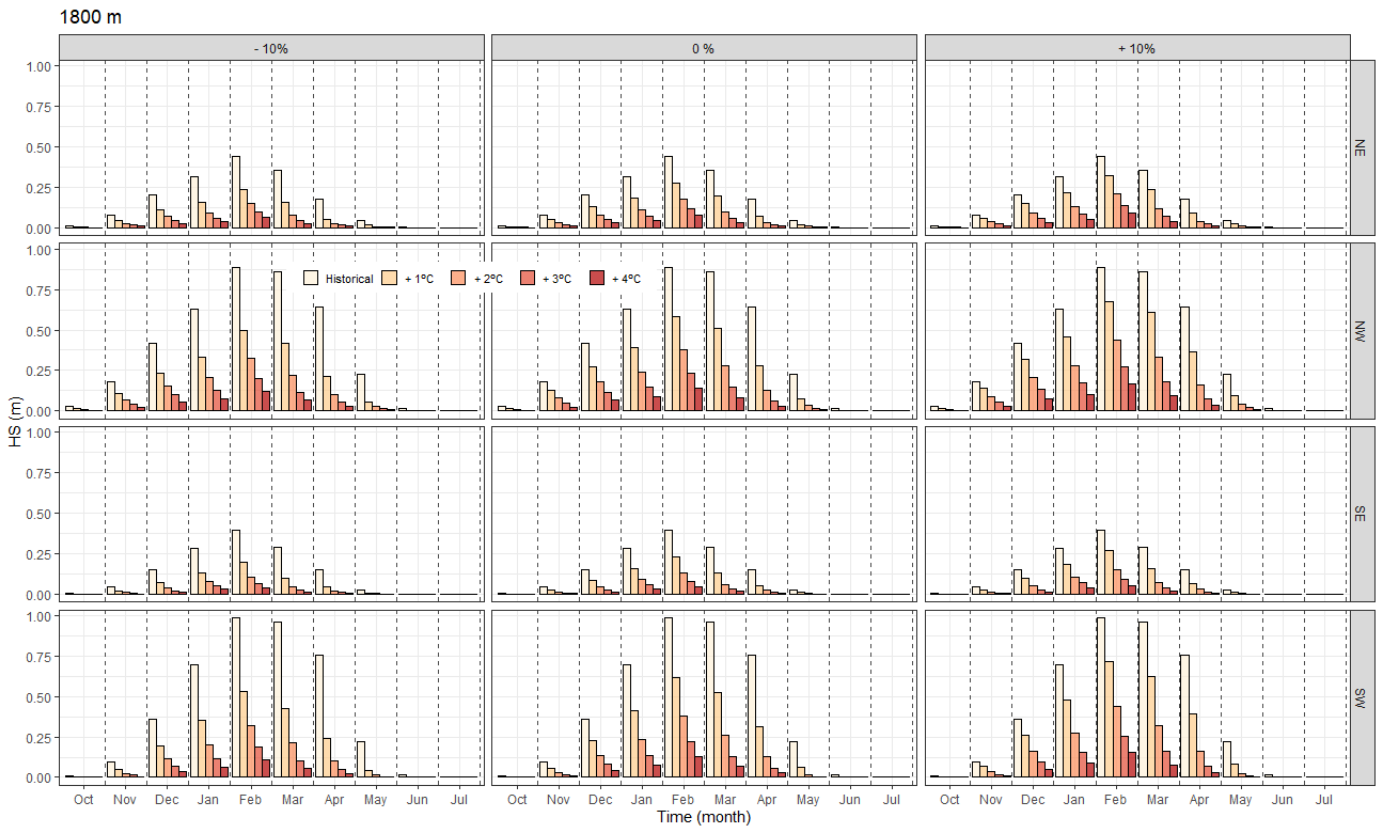

8

9 **Figure S2.** Height of snow (HS) monthly variation at 1800 m for the historical climate period (1980 – 2019)  
 10 and different increments of temperature (colors) grouped by sector and precipitation changes (boxes).  
 11

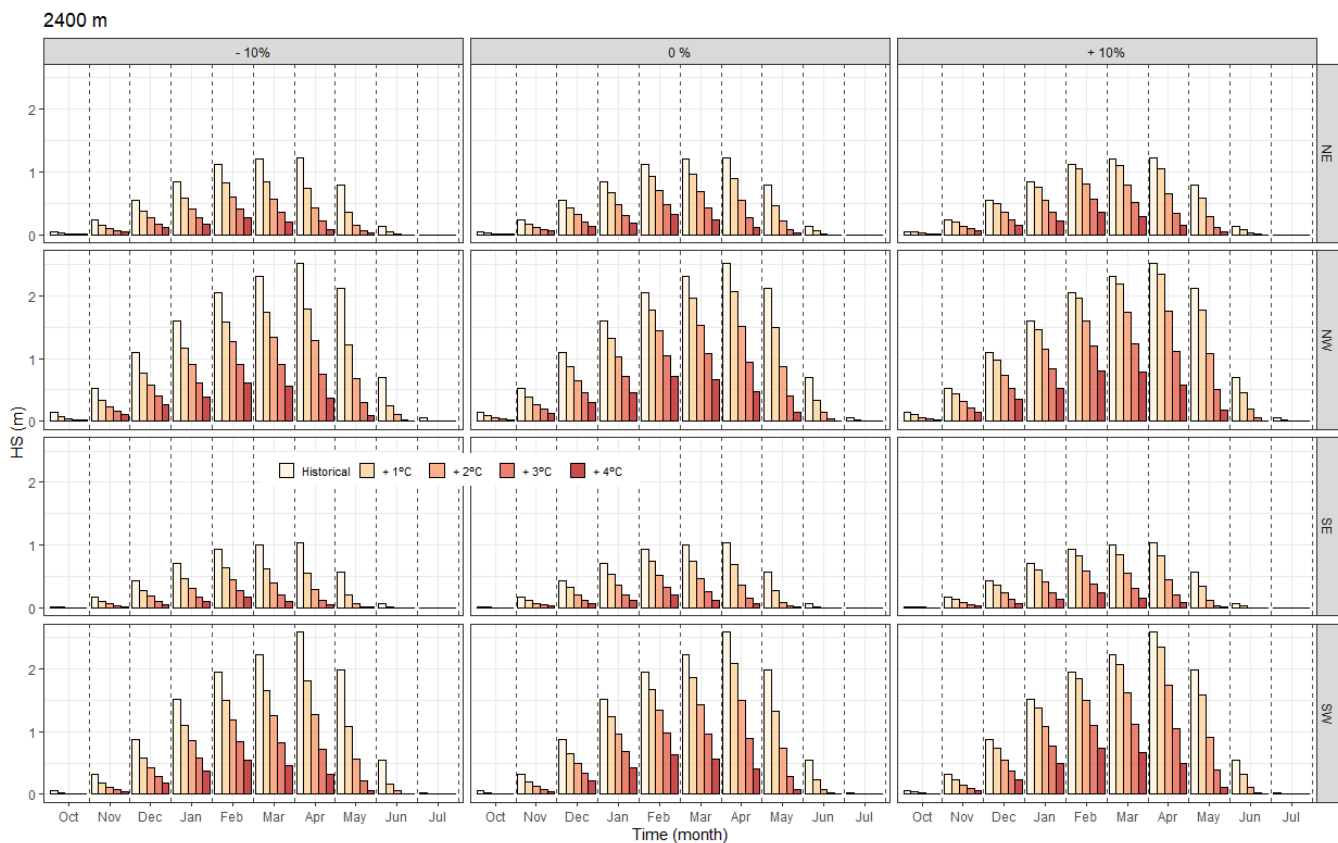

12  
 13  
 14 **Figure S3.** Height of snow (HS) monthly variation at 2400 m for the historical climate period (1980 – 2019)  
 15 and different increments of temperature (colors) grouped by sector and precipitation changes (boxes).  
 16

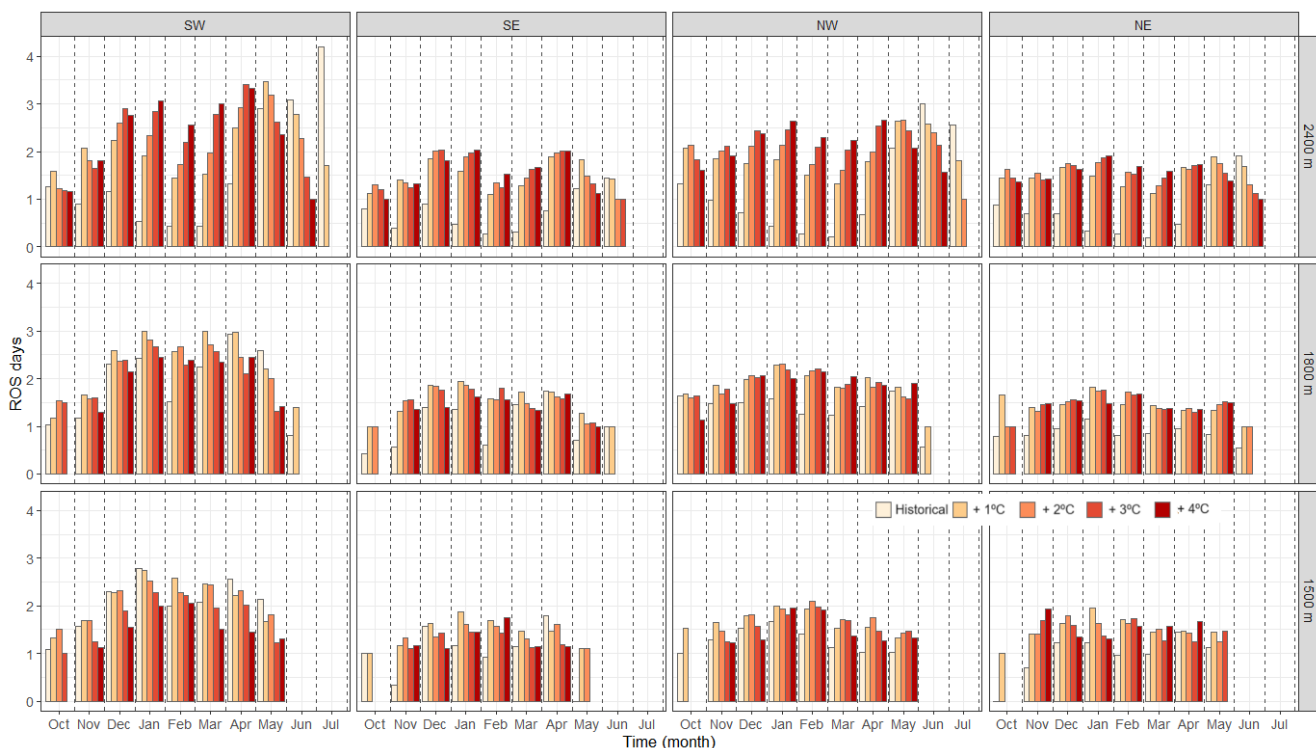

17

18 **Figure S4.** ROS frequency (days). Data are presented for the historical climate period (1980 – 2019) with  
 19 different increments of temperature (colors), grouped by month (x-axis), elevations and sectors (boxes). Data  
 20 represent the average of the simulated precipitation changes (ranging from -10% to + 10%, with increments  
 21 of 10%).  
 22  
 23

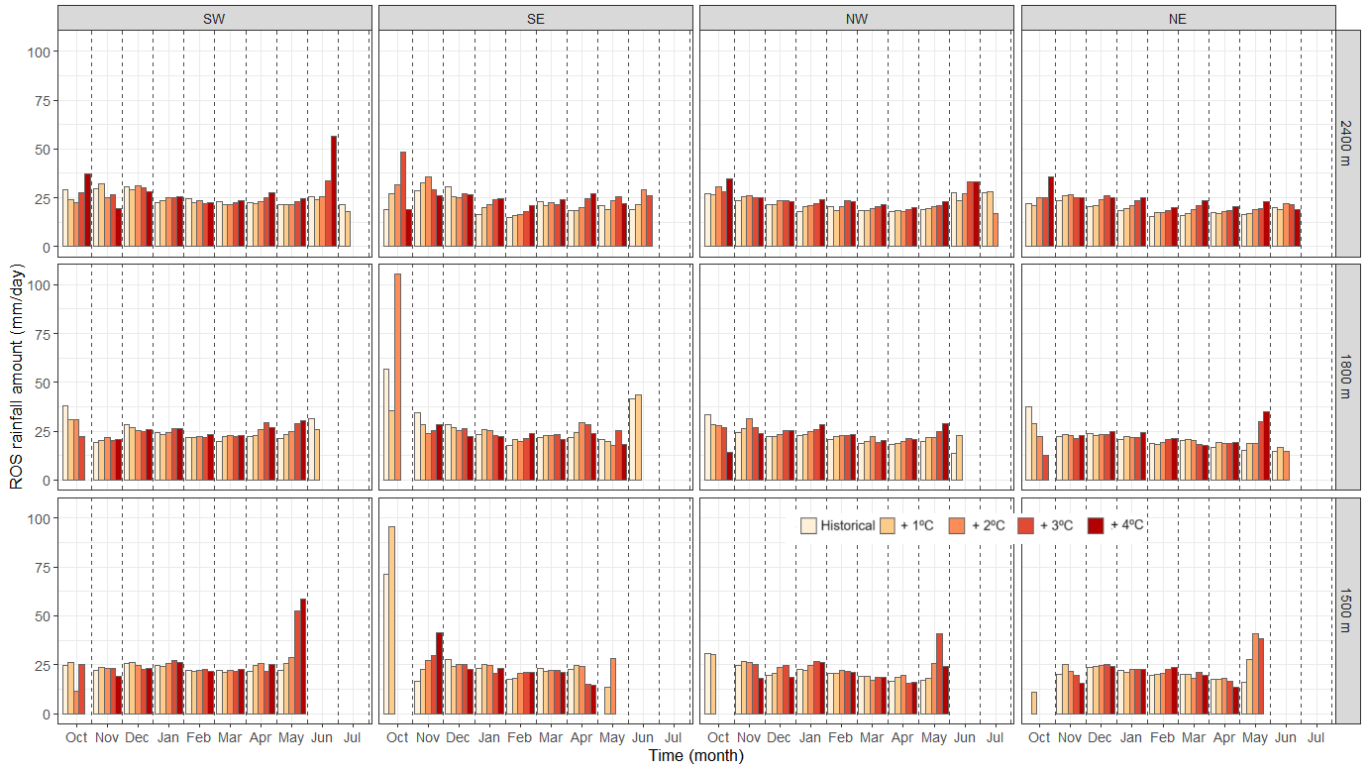

24 **Figure S5.** Average ROS rainfall amount (mm/day). Data are presented for the historical climate period  
 25 (1980 – 2019) with different increments of temperature (colors), grouped by month (x-axis), elevations and  
 26 sectors (boxes). Data represent the average of the simulated precipitation changes (ranging from -10% to +  
 27 10%, with increments of 10%).  
 28  
 29  
 30

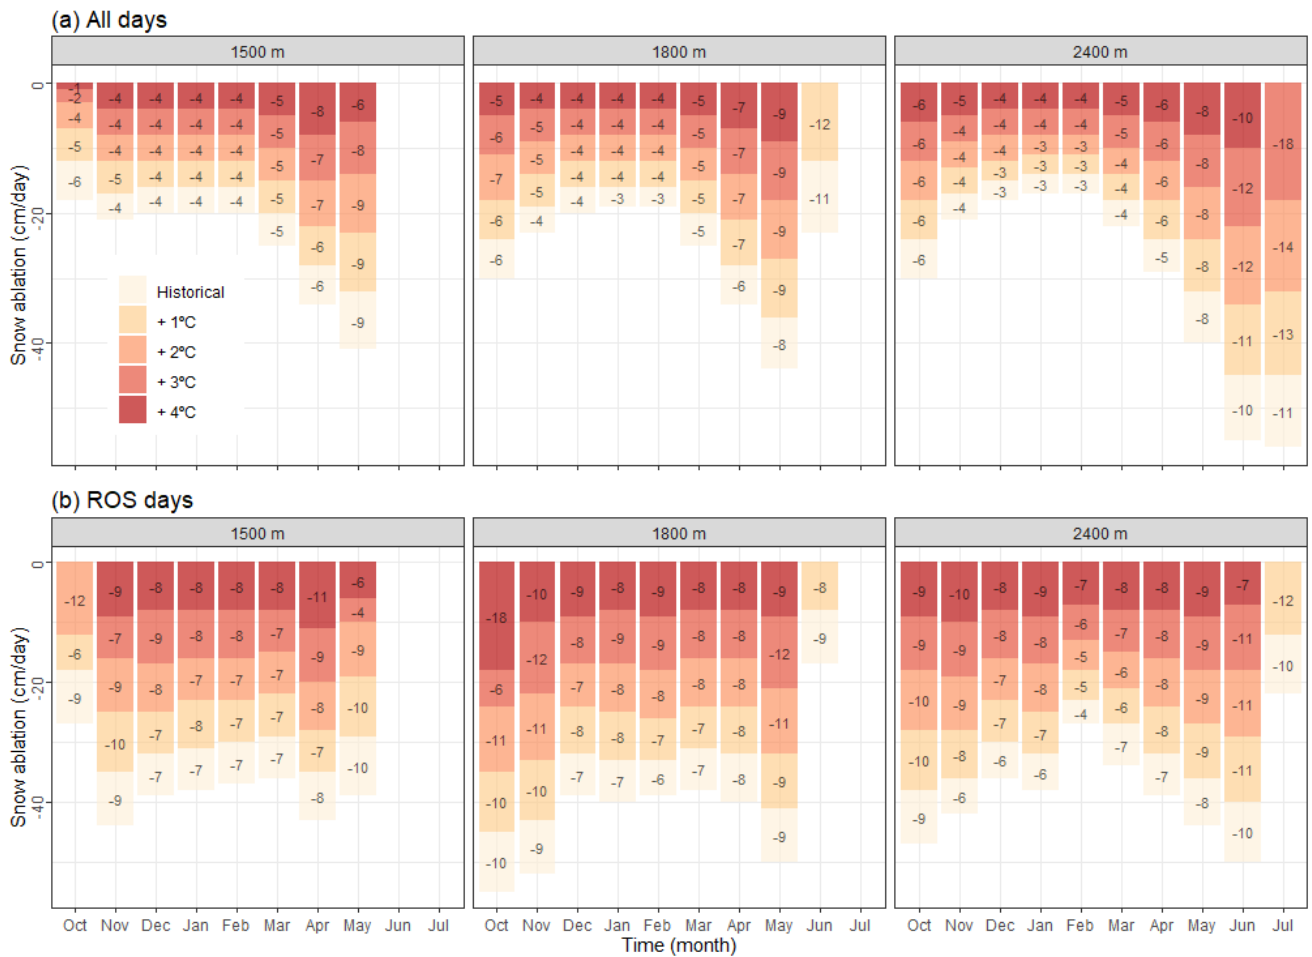

Figure S6. (a) All days and (b) ROS days average daily snow ablation (cm/day).

Table S1. FSM2 configuration implemented in this work.

| FSM2<br>Physics and driving data options | Configuration name                                    | Fortran compilation<br>number |
|------------------------------------------|-------------------------------------------------------|-------------------------------|
| Albedo                                   | Prognostic age function                               | 2                             |
| Snow conductivity                        | Function of density                                   | 1                             |
| Snow density                             | Function of overburden                                | 2                             |
| Turbulent exchange                       | Richardson number atmospheric<br>stability adjustment | 1                             |
| Snow hydrology                           | Gravitational drainage                                | 2                             |
| Snow cover fraction                      | Linear function of snow depth                         | 1                             |

43  
44  
45  
46  
47

**Table S2.** ROS frequency, rainfall intensity and snow ablation average anomalies per °C over the historical climate period.

| <b>Elevation</b> | <b>Sector</b> | <b>ROS rainfall amount</b> | <b>ROS frequency</b> | <b>ROS albatton</b> |
|------------------|---------------|----------------------------|----------------------|---------------------|
| 1500 m           | SW            | +2.5                       | 0                    | +0.5                |
|                  | SE            | +4.7                       | 0                    | -0.2                |
|                  | NW            | +3.8                       | 0                    | -0.2                |
|                  | NE            | +4.7                       | 0                    | -0.3                |
| 1800 m           | SW            | +2.5                       | 0                    | +0.8                |
|                  | SE            | +5.2                       | 0                    | +0.1                |
|                  | NW            | +3.7                       | 0                    | +0.4                |
|                  | NE            | +5.0                       | 0                    | +0.4                |
| 2400 m           | SW            | +5.2                       | 1                    | +0.4                |
|                  | SE            | +6.4                       | 1                    | +0.1                |
|                  | NW            | +5.3                       | 1                    | +0.5                |
|                  | NE            | +6                         | 0                    | +0.7                |

48  
49  
50
